# Supplementary material
Source: PubMed Central journal article supplement (PMC7610841)
Supplement: EMS124251-supplement-Supplementary_Figure_1.pdf [file EMS124251-supplement-Supplementary_Figure_1.pdf]

| Figure Number      | Genotypes                                                                                                                                                                                                                                                         |
|--------------------|-------------------------------------------------------------------------------------------------------------------------------------------------------------------------------------------------------------------------------------------------------------------|
| Figure 1a          | <i>GFP-wg / wg-HA ; hh-Gal4 / UAS-Nrt-MYC-LaG16</i>                                                                                                                                                                                                               |
| Figure 1b          | <i>en-Gal4, UAS-flp / + ; ubi::gfp, FRT2A / dally<sup>MH32</sup>, FRT2A</i>                                                                                                                                                                                       |
| Figure 1c          | <i>en-Gal4, UAS-flp / + ; ubi::gfp, FRT2A / dlp<sup>MH20</sup>, FRT2A</i>                                                                                                                                                                                         |
| Figure 2a          | 1. <i>GFP-wg, ptc-Gal4 / UAS-dlp-HA</i><br>2. <i>GFP-wg[S239A], ptc-Gal4 / UAS-dlp-HA</i>                                                                                                                                                                         |
| Figure 2c          | 1. <i>GFP-wg, ptc-Gal4 / + ; UAS-V5-GPC6 / +</i><br>2. <i>GFP-wg, ptc-Gal4 / + ; UAS-V5-GPC5 / +</i>                                                                                                                                                              |
| Figure 4b          | 1. <i>GFP-wg, ptc-Gal4 / UAS-dlp-HA</i><br>2. <i>GFP-wg, ptc-Gal4 / + ; UAS-dlp[S168M]-HA / +</i><br>3. <i>GFP-wg, ptc-Gal4 / + ; UAS-dlp[M175C/N367C]-HA / +</i>                                                                                                 |
| Extended Data 1a-c | <i>GFP-wg / UAS-Vhh4-CD8-HA ; dpp-Gal4 / +</i>                                                                                                                                                                                                                    |
| Extended Data 1d   | <i>GFP-wg / wg-Gal4, tub::Gal80<sup>ts</sup> ; dpp-lexA, UAS-dlp<sup>DGPI</sup>-V5 / lexAop-Vhh4-CD8-HA</i>                                                                                                                                                       |
| Extended Data 2a   | <i>UAS-Vps4<sup>DN</sup> / + ; hh-Gal4 tub::Gal80<sup>ts</sup> / +</i>                                                                                                                                                                                            |
| Extended Data 2b   | <i>hrs<sup>D28</sup>, FRT40A / arm::lacZ, FRT40A ; hh-Gal4, UAS-FLP / +</i>                                                                                                                                                                                       |
| Extended Data 2c,d | <i>UAS-LpR2e-HA / + ; hh-Gal4, tub::Gal80<sup>ts</sup> / +</i>                                                                                                                                                                                                    |
| Extended Data 2e   | 1. <i>w1118</i><br>2. <i>Df(3R)Lpr1/2 / Df(3R)Lpr1/2</i>                                                                                                                                                                                                          |
| Extended Data 3a   | <i>en-Gal4 / UAS-Swim-RNAi ; UAS-dicer / +</i>                                                                                                                                                                                                                    |
| Extended Data 3c   | 1. <i>w1118</i><br>2. <i>SwimKO / SwimKO</i>                                                                                                                                                                                                                      |
| Extended Data 3d   | <i>en-Gal4, UAS-flp / + ; ubi::gfp, FRT2A / dally<sup>MH32</sup>, dlp<sup>MH20</sup>, FRT2A</i>                                                                                                                                                                   |
| Extended Data 4a   | <i>GFP-wg[S239A], ptc-Gal4 / UAS-Vhh4-CD8-HA</i>                                                                                                                                                                                                                  |
| Extended Data 4e   | 1. <i>GFP-wg, ptc-Gal4 / + ; UAS-V5-GPC3 / +</i><br>2. <i>GFP-wg, ptc-Gal4 / + ; UAS-V5-GPC4 / +</i>                                                                                                                                                              |
| Extended Data 5a   | 1. <i>GFP-wg, ptc-Gal4 / + ; UAS-V5-GPC3 / +</i><br>2. <i>GFP-wg, ptc-Gal4 / + ; UAS-V5-GPC4 / +</i><br>3. <i>GFP-wg, ptc-Gal4 / + ; UAS-V5-GPC5 / +</i><br>4. <i>GFP-wg, ptc-Gal4 / + ; UAS-V5-GPC6 / +</i>                                                      |
| Extended Data 5a   | 1. <i>GFP-wg, en-Gal4 / + ; UAS-V5-GPC3 / +</i><br>2. <i>GFP-wg, en-Gal4 / + ; UAS-V5-GPC4 / +</i><br>3. <i>GFP-wg, en-Gal4 / + ; UAS-V5-GPC5 / +</i><br>4. <i>GFP-wg, en-Gal4 / + ; UAS-V5-GPC6 / +</i>                                                          |
| Extended Data 9a   | 1. <i>GFP-wg, ptc-Gal4 / UAS-dlp-HA</i><br>2. <i>GFP-wg, ptc-Gal4 / + ; UAS-dlp[F172T/F195Y]-HA / +</i><br>3. <i>GFP-wg, ptc-Gal4 / + ; UAS-dlp[R169E/T170N/Q171M/F172T]-HA / +</i><br>4. <i>GFP-wg, ptc-Gal4 / + ; UAS-dally[E149R/N150T/M151Q/T152F]-HA / +</i> |

**Supplementary Table 1**
